# Supplementary material
Source: PubMed Central journal article supplement (PMC2268808)

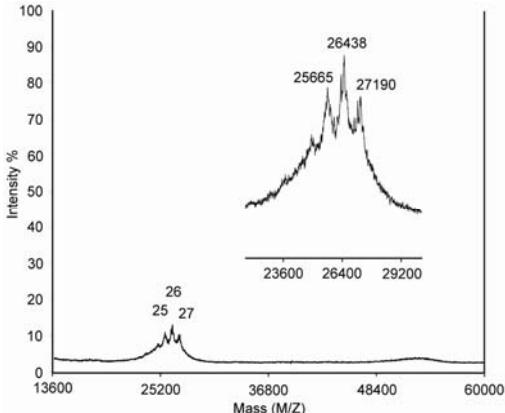

Supplement: pnas_0712326105_1.pdf [file pnas_0712326105_1.pdf]

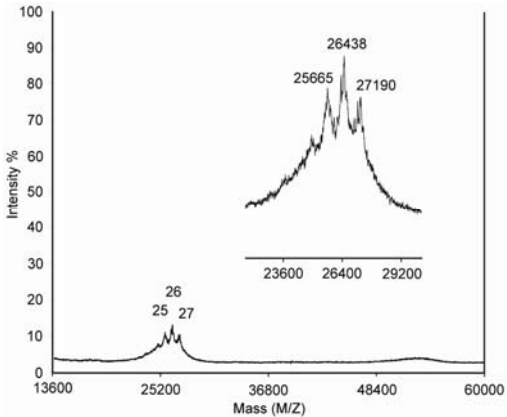

Supplement: pnas_0712326105_3.pdf [file pnas_0712326105_3.pdf]
